# Supplementary material for: O-Acetylated sugars in the gas phase: stability, migration, positional isomers and conformation
Source: Royal Society of Chemistry journal article supplement (doi:10.1039/d1cp04837f), 2021-11-25
Supplement: d1cp04837f1.pdf [file d1cp04837f1.pdf]

## Supporting Information (SI)

### O-acetylated sugars in the gas phase: stability, migration, positional isomers and conformation

Oznur Yeni,<sup>a\*</sup> Amira Gharbi,<sup>a\*</sup> Stéphane Chambert,<sup>b</sup> Jean Rouillon,<sup>b</sup> Abdul-Rahman Allouche,<sup>a</sup> Baptiste Schindler<sup>a</sup> and Isabelle Compagnon<sup>\*a</sup>

<sup>a.</sup> Univ. Lyon, Université Claude Bernard Lyon 1, CNRS, Institut Lumière Matière, F-69622 Villeurbanne, France.

<sup>b.</sup> Univ Lyon, INSA Lyon, Université Claude Bernard Lyon 1, CPE Lyon, CNRS, UMR 5246, ICBMS, Institut de Chimie et de Biochimie Moléculaires et Supramoléculaires, Bât. E. Lederer, 1 rue Victor Grignard F-69622 Villeurbanne, France.

Proton nuclear magnetic resonances (<sup>1</sup>H NMR) and carbon nuclear magnetic resonances (<sup>13</sup>C NMR) were recorded in deuterated solvents on Bruker AC spectrometers (400 MHz). Chemical shifts are reported in parts per million (ppm,  $\delta$ ) relative to the deuterated solvent (CD<sub>3</sub>OD,  $\delta$  3.31 & 4.87 ppm, indicated by an asterisk on the spectra). Traces of residual solvents are indicated by circles. <sup>1</sup>H NMR splitting patterns are designated as singlet (s), doublet (d), triplet (t), doublet of doublets (dd), doublet of doublets of doublets (ddd), or multiplet (m) if it is not interpreted correctly. Coupling constants are reported in Hertz (Hz). The assignment of resonances for all compounds was made by two-dimensional homonuclear and heteronuclear chemical shift correlation experiments. Analytical thin layer chromatography (TLC) was carried out on Silica Gel plates (Merck 60 F254). TLC plates were analysed by heating plates that were dipped in a solution of 10% H<sub>2</sub>SO<sub>4</sub> in EtOH (v/v). Solvent mixtures used for TLC and column chromatography are reported in v/v ratios. All commercially available reagents and solvents used without further purification, and all reactions were carried out in oven-dried glassware and under argon atmosphere.

#### Methyl 3-O-acetyl-2-acetamido-2-deoxy- $\beta$ -D-glucopyranoside (1)

To a solution of methyl 2-acetamido-2-deoxy- $\beta$ -D-glucopyranoside (200 mg, 0.86 mmol) in anhydrous pyridine (5 mL), 4,4'-dimethoxytrityl chloride (1.2 equiv., 1.03 mmol) was added. The resulting solution was stirred at room temperature for 10 hours. After control that all reactant were converted by TLC, acetyl chloride (3.6 equiv., 3.09 mmol) was added stepwise 3 x 1.2 equivalents at 0°C. Methanol (3.6 equiv., 3.10 mmol) was added and solvents were removed *in vacuo*. The orange solid as obtained was dissolved in 2 mL of a solution of 2% dichloroacetic acid in dichloromethane. After 2 minutes, the orange solution was directly purified by SiO<sub>2</sub> column chromatography (DCM-MeOH, 95:5 and after 9:1) to give the monoester **1**, a white solid (146 mg, 62%). <sup>1</sup>H NMR (400 MHz, MeOD):  $\delta$  **4.96** (dd, J = 10.6, 9.1 Hz, 1H, H<sub>3</sub>), **4.43** (d, J = 8.5 Hz, 1H, H<sub>1</sub>), **3.89** (dd, J = 12.0, 2.3 Hz, 1H, H<sub>6a</sub>), **3.78** (dd, J = 10.6, 8.5 Hz, 1H, H<sub>4</sub>), **3.71** (dd, J = 12.0, 5.5 Hz, 1H, H<sub>6b</sub>), **3.52** (dd, J = 9.0, 7.3, 1H, H<sub>2</sub>), **3.48** (s, 3H, OMe), **3.35** (ddd, J = 9.8, 5.5, 2.3 Hz, 1H, H<sub>5</sub>), **2.04** (s, 3H, OAc), **1.89** (s, 3H, NHAc); <sup>13</sup>C NMR (101 MHz, MeOD):  $\delta$  **173.39** (O-C=O), **172.47** (HN-C=O), **103.08** (C<sub>1</sub>), **77.82** (C<sub>5</sub>), **77.38** (C<sub>3</sub>), **69.64** (C<sub>2</sub>), **62.39** (C<sub>6</sub>), **57.10** (OMe), **55.36** (C<sub>4</sub>), **22.73**, (AcN), **20.86** (AcO); HRMS m/z calcd. for C<sub>11</sub>H<sub>19</sub>NNaO<sub>7</sub> (M+Na<sup>+</sup>) 300.1059, found 300.1054.

#### Methyl 6-O-acetyl-2-acetamido-2-deoxy- $\beta$ -D-glucopyranoside (2)

Methyl 2-acetamido-2-deoxy- $\beta$ -D-glucopyranoside (50 mg, 21.5 mmol) and triphenylphosphine (112.8 mg, 43 mmol) were suspended in anhydrous toluene (15 mL). To remove the water content, 10 mL of solvent were evaporated off and the remaining suspension was placed under argon before dimethylformamide (1 mL) and acetic acid (24.6  $\mu$  L, 43 mmol) were added. The reaction was placed at 0°C and diisopropyl azodicarboxylate (105.7  $\mu$  L, 3.75 mmol) was introduced. The reaction mixture was left stirring for 3 h and then directly subjected to a silica gel column chromatography using dichloromethane/methanol (85/15) as eluent. After evaporation, compound **2** was obtained as a white solid (18 mg, 39%).

<sup>1</sup>H NMR (400 MHz, MeOD)  $\delta$  **4.41** (dd, J = 11.9, 2.1 Hz, 1H, H<sub>6a</sub>), **4.31** (d, J = 8.4 Hz, 1H, H<sub>1</sub>), **4.22** (dd, J = 11.9, 5.8 Hz, 1H, H<sub>6b</sub>), **3.63** (dd, J = 10.2, 8.4 Hz, 1H, H<sub>3</sub>), **3.48 – 3.44** (m, 2H, H<sub>2</sub> and H<sub>5</sub>), **3.43** (s, 3H, OMe), **3.37 – 3.33** (m, 1H, H<sub>4</sub>), **2.07** (s, 3H, OAc), **1.97** (s, 3H, NHAc); <sup>13</sup>C NMR (101 MHz, MeOD)  $\delta$  **173.78** (HN-C=O), **172.74** (O-C=O), **103.51** (C<sub>1</sub>),

75.96 (C<sub>2</sub>), 75.27 (C<sub>5</sub>), 72.02 (C<sub>4</sub>), 64.70 (C<sub>6</sub>), 57.16 (C<sub>3</sub>), 56.91 (OMe), 22.92 (AcN), 20.68 (AcO); HRMS m/z calcd. for C<sub>11</sub>H<sub>19</sub>NNaO<sub>7</sub> (M+Na<sup>+</sup>) 300.1059, found 300.1054.

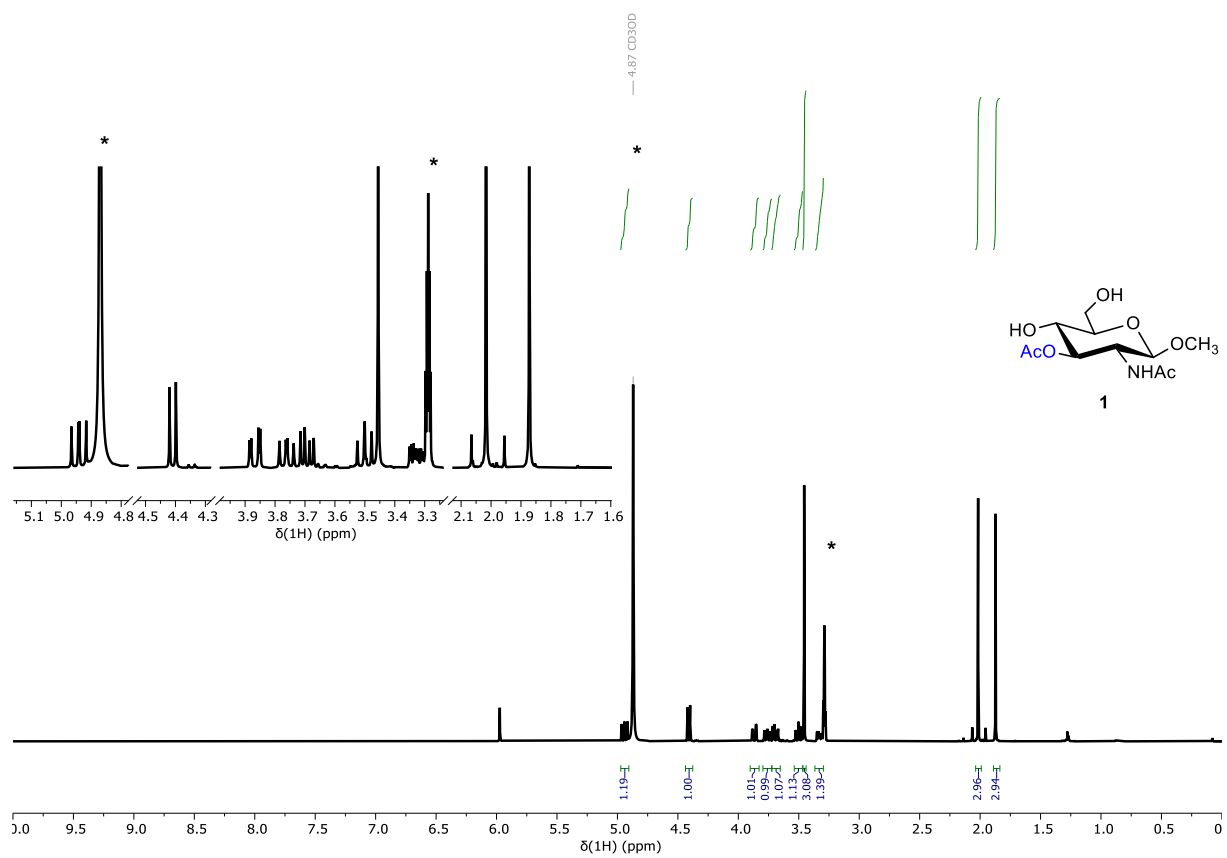

**Fig S1.** <sup>1</sup>H-NMR spectrum of β-GlcNAcOMe3OAc (**1**)

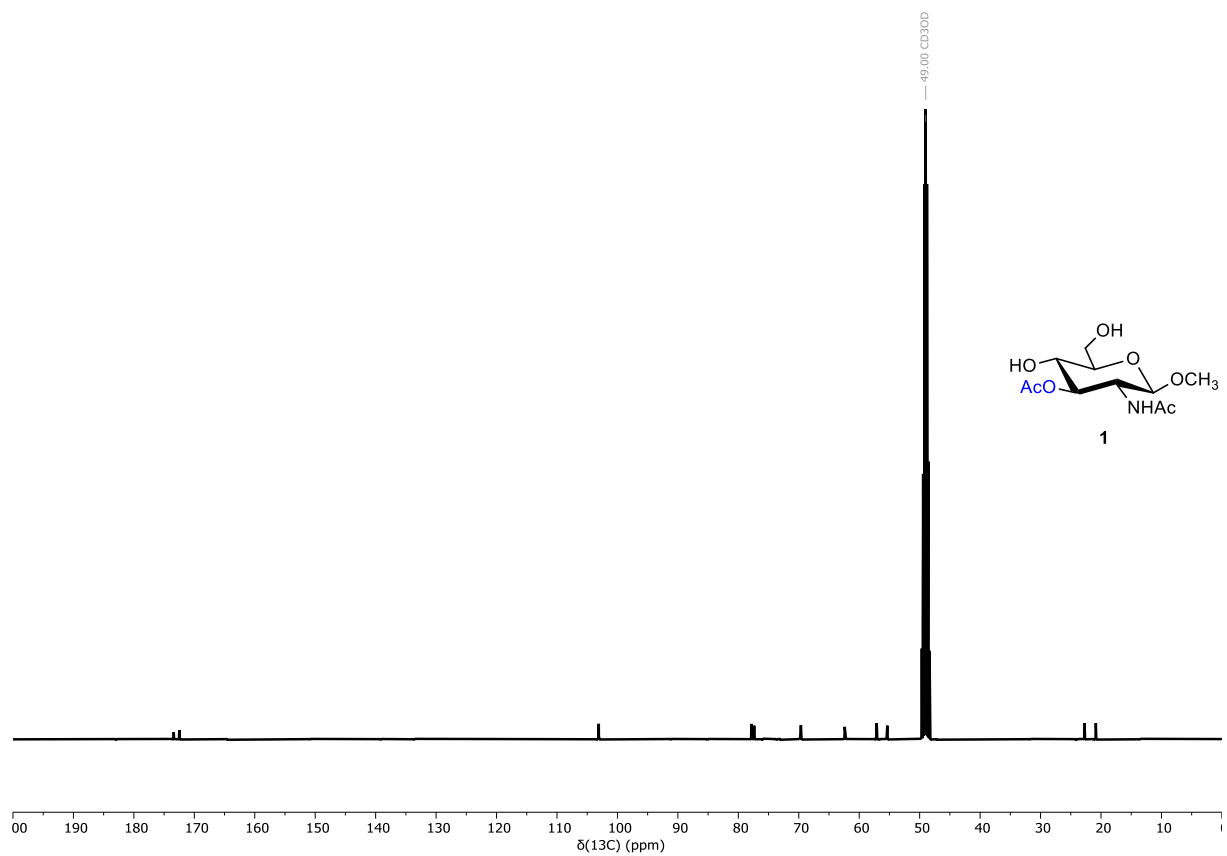

**Fig S2.**  $^{13}\text{C}$ -NMR spectrum of  $\beta$ -GlcNAcOMe3OAc (**1**)

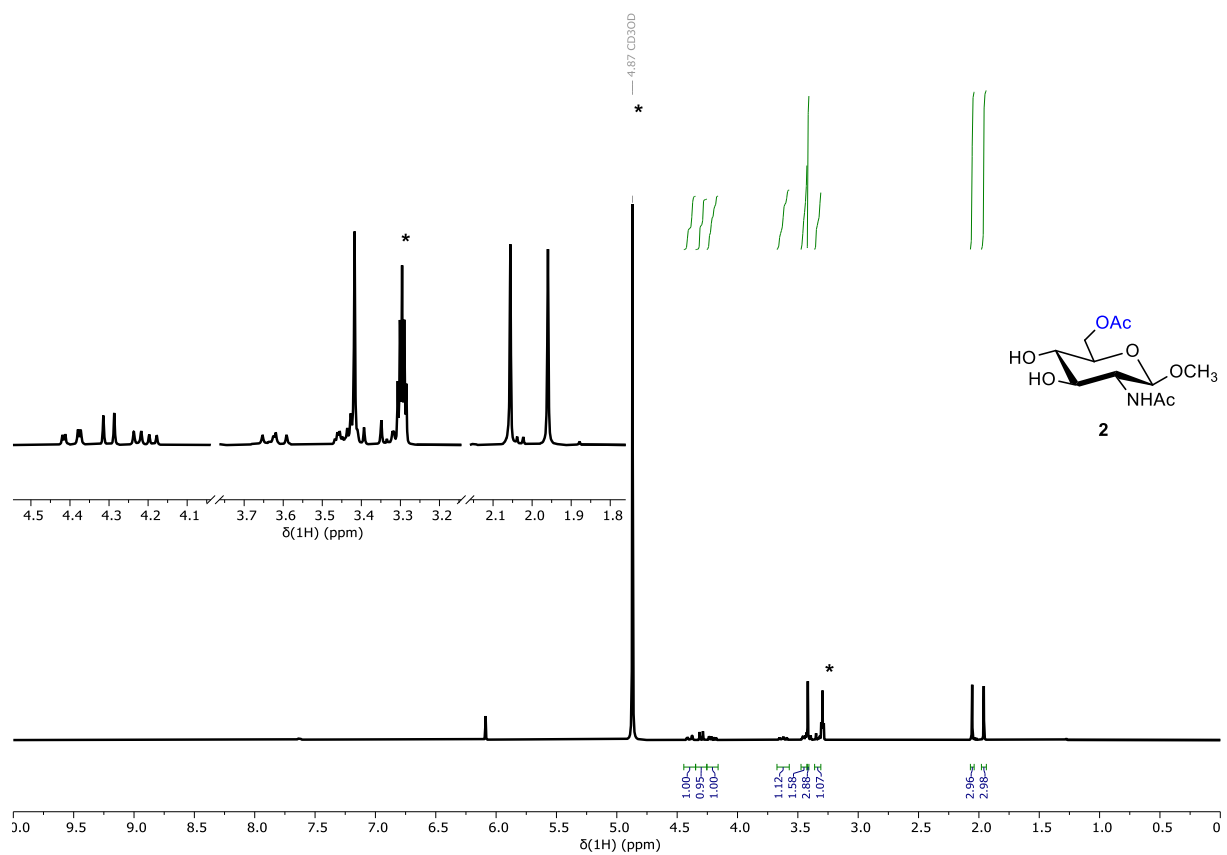

**Fig S3.**  $^1\text{H}$ -NMR spectrum of  $\beta$ -GlcNAcOMe6OAc (**2**)

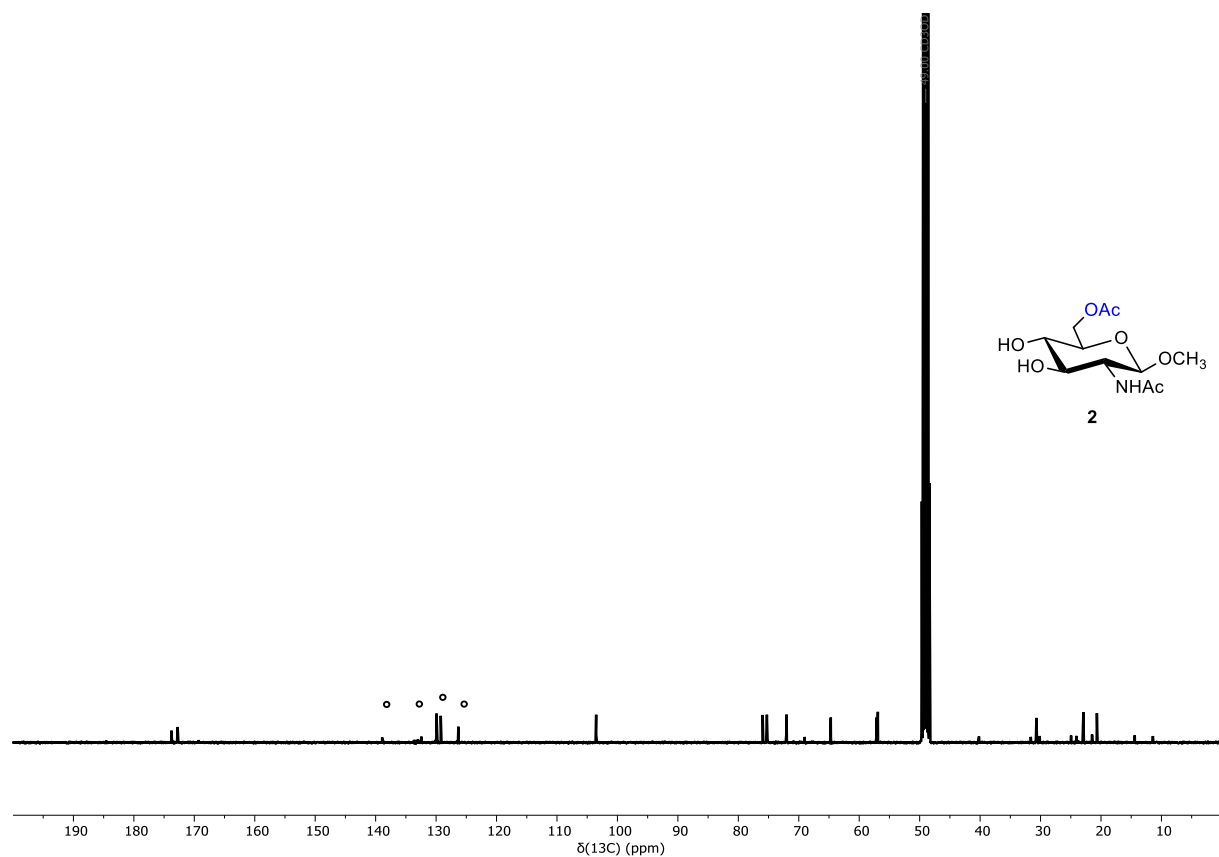

**Fig S4.** <sup>13</sup>C-NMR spectrum of  $\beta$ -GlcNAcOMe6OAc (2)

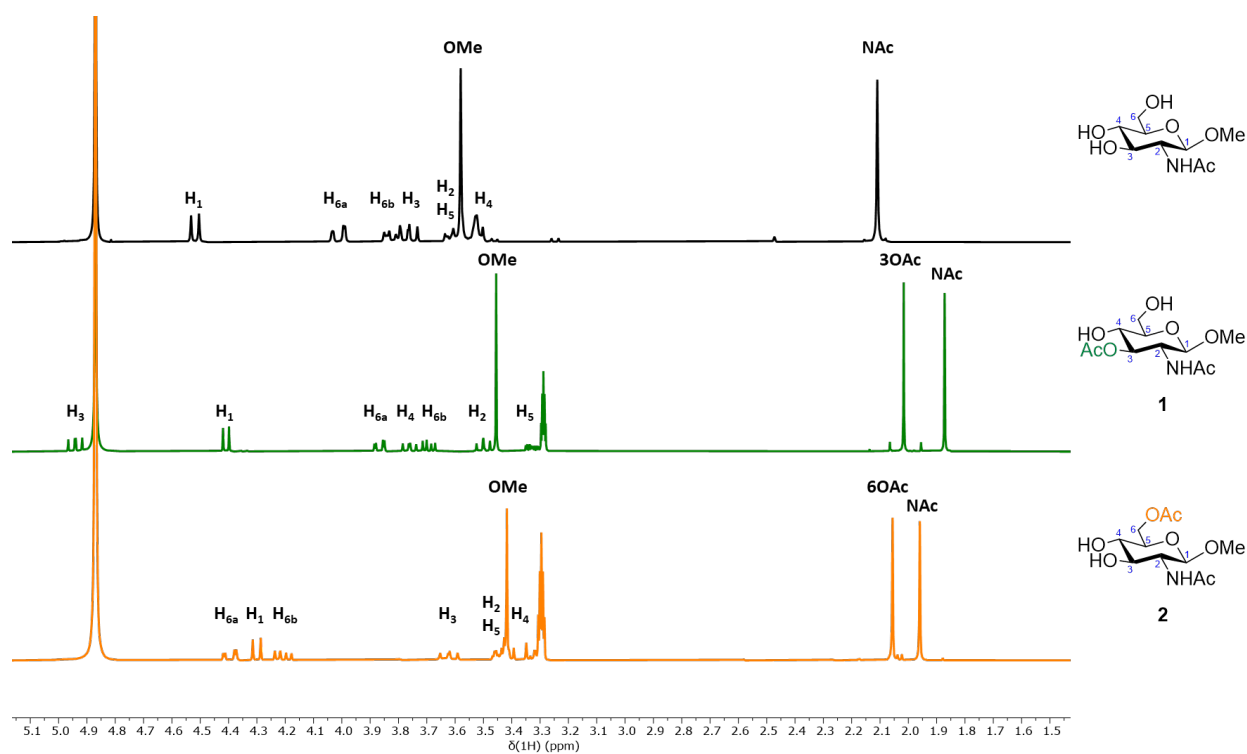

**Fig S5.** Assignment of the different protons of the <sup>1</sup>H-NMR spectra of  $\beta$ -GlcNAcOMe (black), compound 1 (green) and compound 2 (orange).

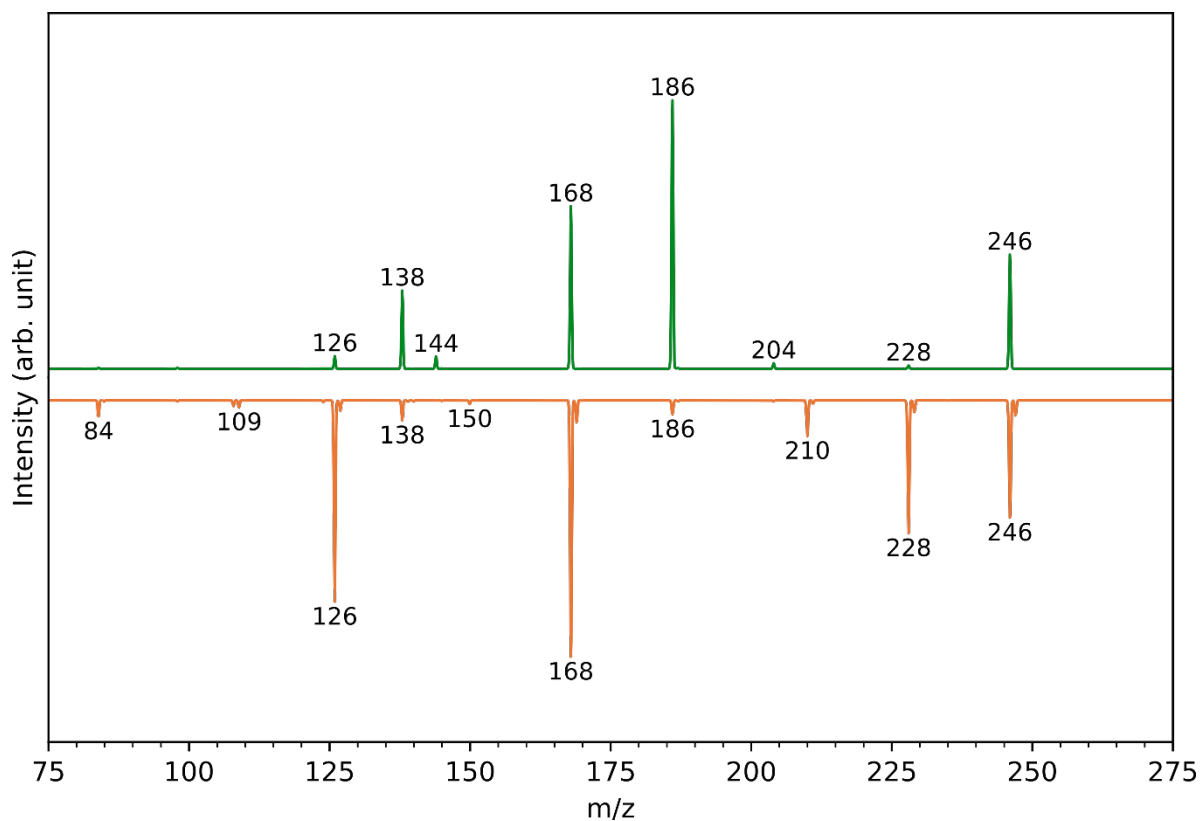

**Fig S6.** MS<sup>3</sup> spectra of  $\beta$ GlcNAcOME acetylated on C3 (green) or C6 (orange)

a.

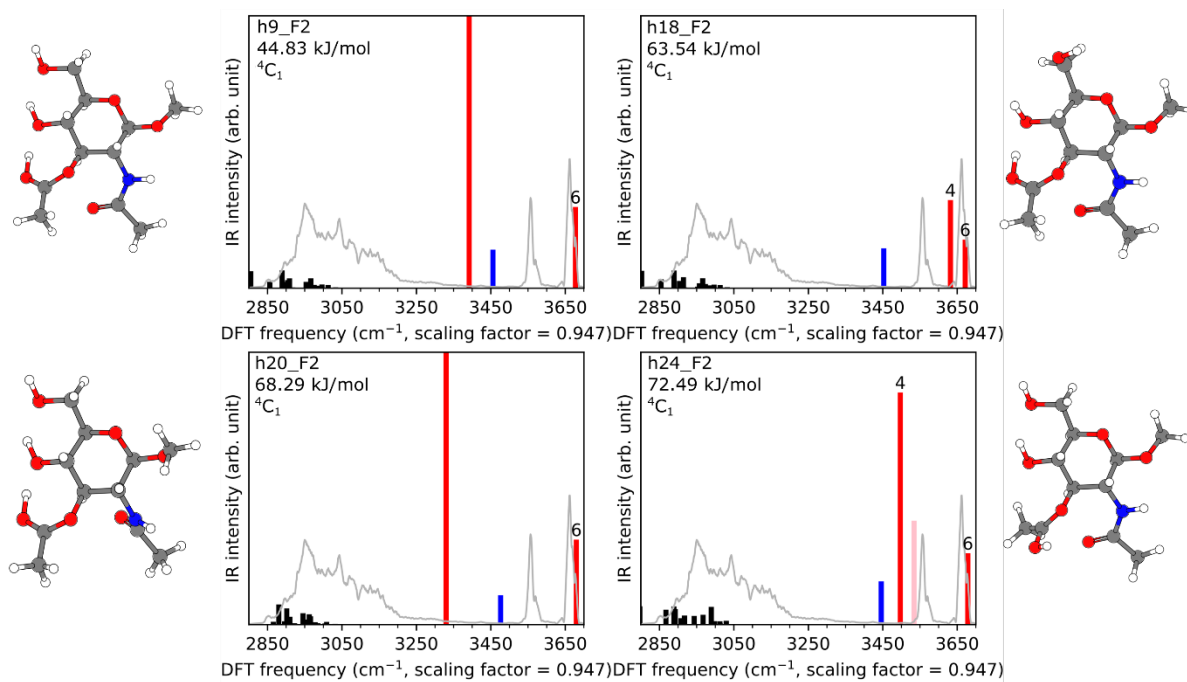

b.

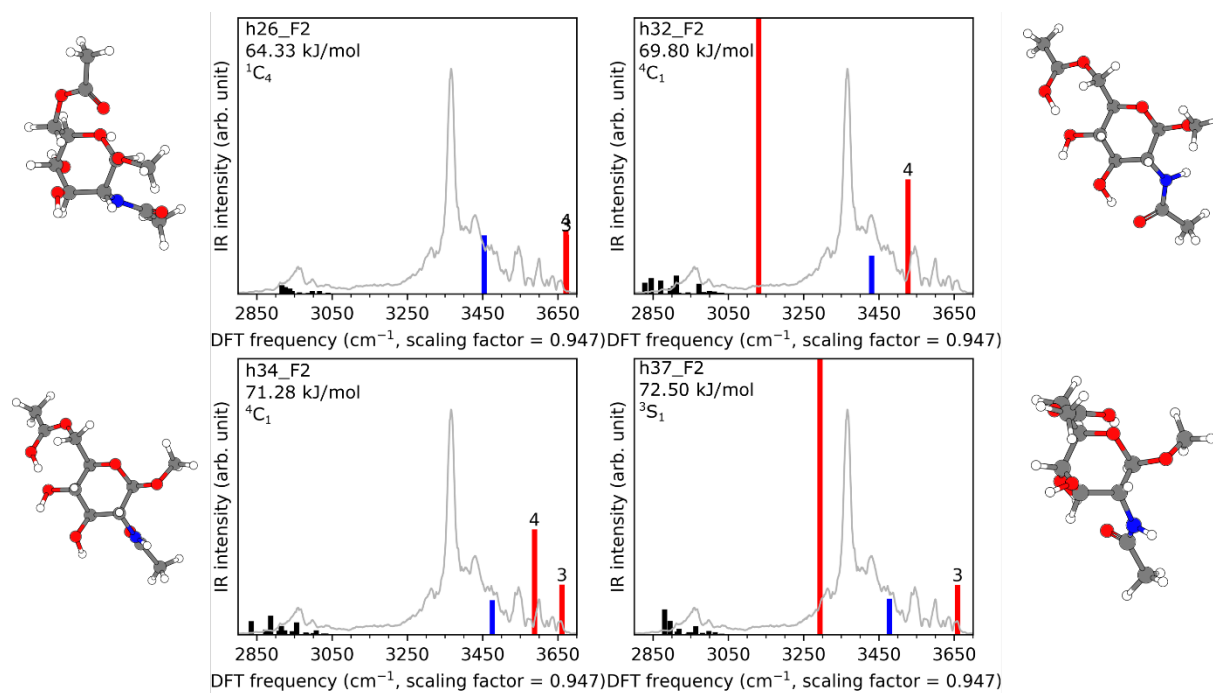

**Fig S7.** Experimental spectrum (grey line) compared with IR spectra of conformers with protonation on OAc of  $\beta$ GlcNAcOMe3OAc (a) and  $\beta$ GlcNAcOMe6OAc (b). OH stretches are colored in red (with label indicating its ring position), NH in blue, CH in black and acetyl OH in pink. The relative energies are given in reference to the most stable forms: the NAc protomers ( ${}^4C_1$ -3OAc and  ${}^4C_1$ -6OAc, see figure 2)

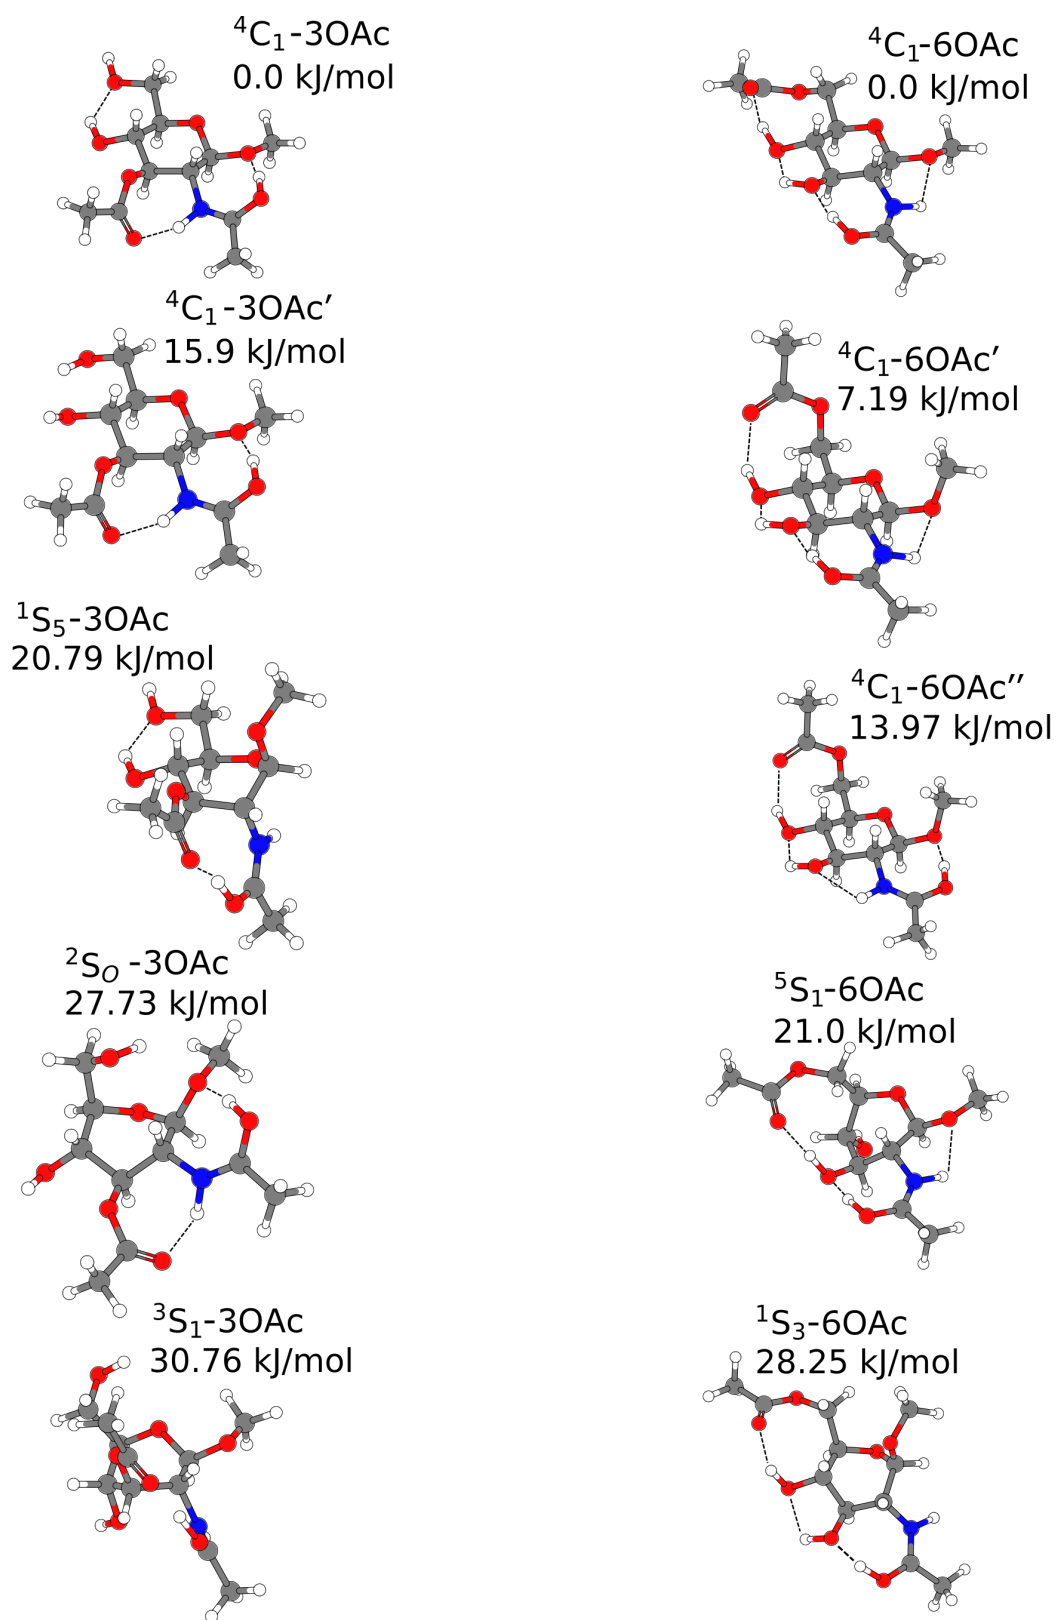

**Fig S8.** Molecular drawings of  $\beta$ GlcNAcOMe3OAc (left) and  $\beta$ GlcNAcOMe6OAc (right). Hydrogen bonds are represented by dotted lines.
